# Supplementary material for: Allelotypes of lung adenocarcinomas featuring ALK fusion demonstrate fewer onco- and suppressor gene changes
Source: PubMed Central journal article supplement (PMC3599044; doi:10.1186/1471-2407-13-8), 2013-01-05
Supplement: 1471-2407-13-8-S2.pdf [file 1471-2407-13-8-S2.pdf]

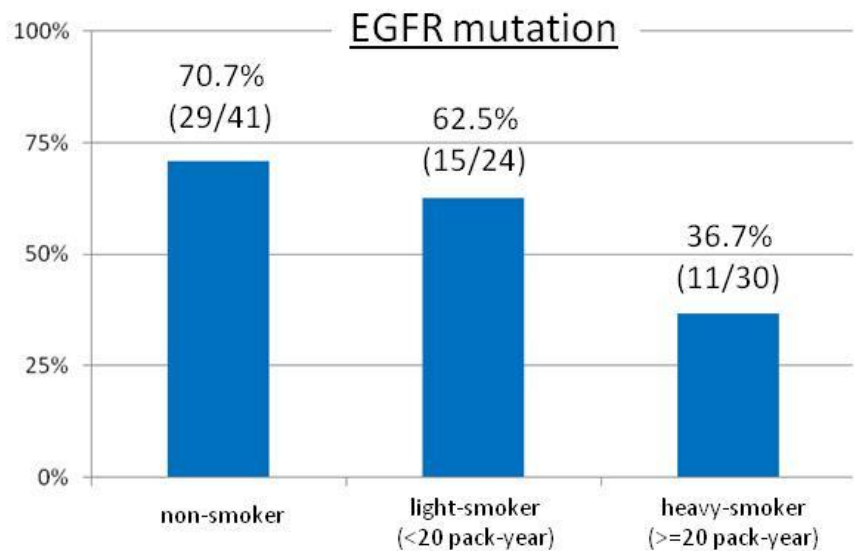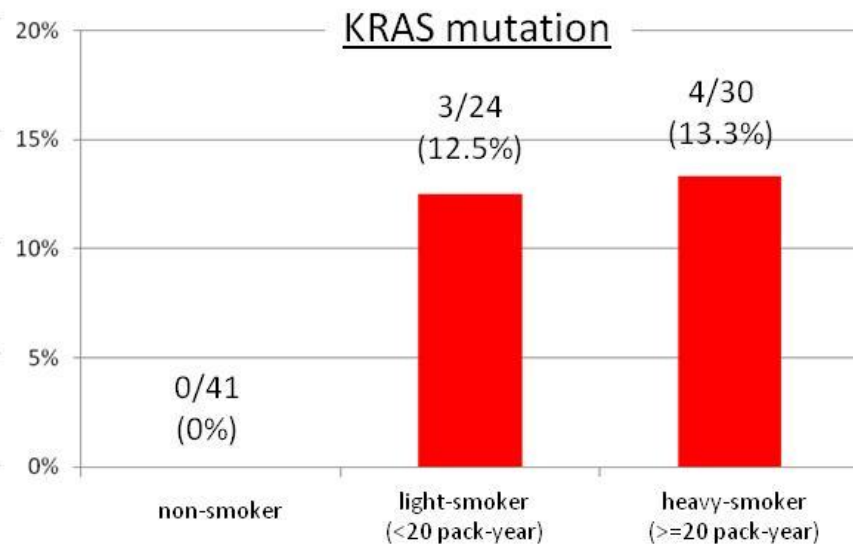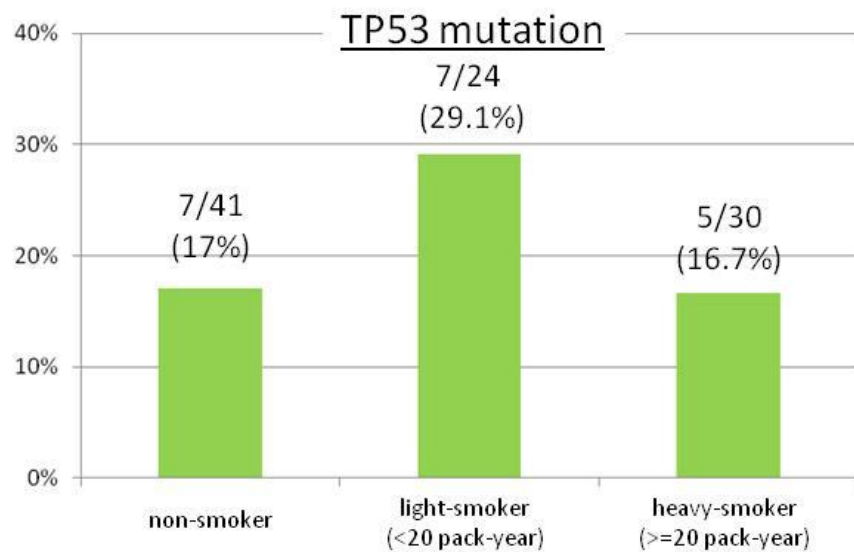

Ninomiya et al. Supplementary Fig S1.
